# Supplementary material for: Dupilumab suppresses type 2 inflammatory biomarkers across multiple atopic, allergic diseases
Source: PubMed Central journal article supplement (PMC8362102; doi:10.1111/cea.13954), 2021-06-26
Supplement: CEA-51-915-s001.pdf [file CEA-51-915-s001.pdf]

**Supplementary materials for the article:**  
**Dupilumab suppresses type 2 inflammatory biomarkers across multiple atopic, allergic  
diseases**

Jennifer D. Hamilton; Sivan Harel; Brian N. Swanson; William Brian; Zhen Chen; Megan S. Rice;  
Nikhil Amin; Marius Ardeleanu; Allen Radin; Brad Shumel; Marcella Ruddy; Naimish Patel;  
Gianluca Pirozzi; Leda Mannent; and Neil M.H. Graham

This appendix has been provided by the authors to give readers additional information about their  
work.

## APPENDICES

|                                                                                                                                                                                          |    |
|------------------------------------------------------------------------------------------------------------------------------------------------------------------------------------------|----|
| Appendix S1. Baseline demographics and history of atopic disease in patients with atopic dermatitis, asthma, chronic rhinosinusitis with nasal polyps and eosinophilic esophagitis ..... | 3  |
| Appendix S2. Mean biomarkers at baseline and end of treatment for patients with atopic dermatitis, asthma, chronic rhinosinusitis with nasal polyps, and eosinophilic esophagitis .....  | 6  |
| Appendix S3. The effect of dupilumab on mean ( $\pm$ SE) concentrations of blood eosinophils (Giga/L) .....                                                                              | 12 |

**APPENDIX S1** Baseline demographics and history of atopic disease in patients with atopic dermatitis, asthma, chronic rhinosinusitis with nasal polyps and eosinophilic esophagitis

| Type 2 disease               | Atopic dermatitis    |                          | Asthma                            |                                           | Chronic rhinosinusitis with nasal polyps |                                       | Atopic dermatitis |                             | Eosinophilic esophagitis |                            |
|------------------------------|----------------------|--------------------------|-----------------------------------|-------------------------------------------|------------------------------------------|---------------------------------------|-------------------|-----------------------------|--------------------------|----------------------------|
| Study name                   | CHRONOS              |                          | QUEST                             |                                           | SINUS-52                                 |                                       | SOLO-1 and SOLO-2 |                             | EoE PoC                  |                            |
| Study duration               | 52 weeks             |                          | 52 weeks                          |                                           | 52 weeks                                 |                                       | 16 weeks          |                             | 12 weeks                 |                            |
| Treatment group              | Placebo              | Dupilumab<br>300 mg      | Placebo<br>2mL q2w +<br>ICS/LABA, | Dupilumab<br>300 mg<br>q2w +<br>ICS/LABA, | Placebo<br>q2w<br>+ INCS,                | Dupilumab<br>300 mg<br>q2w +<br>INCS, | Placebo<br>qw,    | Dupilumab<br>300 mg<br>q2w, | Placebo<br>qw,           | Dupilumab<br>300 mg<br>qw, |
|                              | qw + TCS,<br>n = 315 | q2w +<br>TCS,<br>n = 106 | n = 321                           | n = 633                                   | n = 153                                  | n = 150                               | n = 460           | n = 457                     | n = 24                   | n = 23                     |
| <b>Baseline demographics</b> |                      |                          |                                   |                                           |                                          |                                       |                   |                             |                          |                            |
| Age, mean (SD), years        | 36.6<br>(13.0)       | 39.6<br>(14.0)           | 48.2<br>(14.7)                    | 47.7<br>(15.6)                            | 51.7<br>(12.7)                           | 51.9<br>(11.9)                        | 38.4<br>(14.0)    | 38.3<br>(14.4)              | 36.1<br>(12.8)           | 33.1<br>(8.7)              |
| Male, n (%)                  | 193<br>(61.3)        | 62<br>(58.5)             | 103<br>(32.1)                     | 239<br>(37.8)                             | 95<br>(62.1)                             | 97<br>(64.7)                          | 250<br>(54.3)     | 267<br>(58.4)               | 10<br>(41.7)             | 13<br>(56.5)               |

|               |               |              |               |               |              |              |               |               |              |              |
|---------------|---------------|--------------|---------------|---------------|--------------|--------------|---------------|---------------|--------------|--------------|
| Female, n (%) | 122<br>(38.7) | 44<br>(41.5) | 218<br>(67.9) | 394<br>(62.2) | 58<br>(37.9) | 53<br>(35.3) | 210<br>(45.7) | 190<br>(41.6) | 14<br>(58.3) | 10<br>(43.5) |
|---------------|---------------|--------------|---------------|---------------|--------------|--------------|---------------|---------------|--------------|--------------|

**Current history of comorbid type 2 immune diseases,<sup>a</sup> n (%)**

|                                                 |               |               |               |               |              |              |               |               |              |              |
|-------------------------------------------------|---------------|---------------|---------------|---------------|--------------|--------------|---------------|---------------|--------------|--------------|
| Allergies (other than food allergy)             | 201<br>(63.8) | 68<br>(61.8)  |               |               |              |              |               |               | 9<br>(37.5)  | 14<br>(60.9) |
| Allergic conjunctivitis (kerato-conjunctivitis) | 68 (21.6)     | 31 (28.2)     | 49 (15.3)     | 89 (14.1)     | 10 (6.5)     | 6 (4.0)      |               |               | 3 (12.5)     | 3 (13.0)     |
| Allergic rhinitis                               | 134<br>(42.5) | 53<br>(48.2)  | 225<br>(70.1) | 438<br>(69.2) | 74<br>(48.4) | 72<br>(48.0) | 224<br>(48.7) | 224<br>(49.0) | 14<br>(58.3) | 16<br>(69.6) |
| Asthma                                          | 130<br>(41.3) | 45<br>(40.9)  |               |               | 91<br>(59.5) | 85<br>(56.7) | 205<br>(44.6) | 226<br>(49.5) | 8<br>(33.3)  | 8<br>(34.8)  |
| Atopic dermatitis                               | 310<br>(98.4) | 108<br>(98.2) | 38<br>(11.8)  | 62<br>(9.8)   | 10<br>(6.5)  | 4<br>(2.7)   | –             | –             | 4<br>(16.7)  | 3<br>(13.0)  |
| Chronic rhinosinusitis                          | 26<br>(8.3)   | 7<br>(6.4)    | 63<br>(19.6)  | 113<br>(17.9) | –            | –            |               |               | 8<br>(33.3)  | 2<br>(8.7)   |
| Eosinophilic esophagitis                        | 0             | 1 (0.9)       | 2 (0.6)       | 0             | 0            | 1 (0.7)      |               |               | –            | –            |
| Food allergy                                    | 96<br>(30.5)  | 39<br>(35.5)  | 36<br>(11.2)  | 47<br>(7.4)   | 16<br>(10.5) | 8<br>(5.3)   | 174<br>(37.8) | 177<br>(38.7) | 16<br>(66.7) | 14<br>(60.9) |

|              |           |           |           |           |         |         |          |          |          |          |
|--------------|-----------|-----------|-----------|-----------|---------|---------|----------|----------|----------|----------|
| Hives        | 34 (10.8) | 14 (12.7) | 15 (4.7)  | 30 (4.7)  | 6 (3.9) | 3 (2.0) |          |          | 5 (20.8) | 6 (26.1) |
| Nasal polyps | 7 (2.2)   | 2 (1.8)   | 40 (12.5) | 81 (12.8) | –       | –       | 18 (3.9) | 19 (4.2) | 2 (8.3)  | 1 (4.3)  |

Note: SOLO: full analysis set; CHRONOS and EoE PoC: safety analysis set; QUEST and SINUS-52: randomized population. Grey cells indicate that data were not collected or available for these patients.

Abbreviations: EoE, eosinophilic esophagitis; ICS, inhaled corticosteroids; INCS, intranasal corticosteroids; LABA, long-acting  $\beta_2$ -agonist; n, number; PoC, proof of concept; qw, weekly; q2w, every 2 weeks; SD, standard deviation; TCS, topical corticosteroids.

<sup>a</sup>For asthma, this refers to a medical history.

**APPENDIX S2** Mean biomarkers at baseline and end of treatment for patients with atopic dermatitis, asthma, chronic rhinosinusitis with nasal polyps, and eosinophilic esophagitis

| Type 2 disease                      | Atopic dermatitis   |                                     | Asthma                              |                                          | Chronic rhinosinusitis with nasal polyps |                                      | Atopic dermatitis   |                            | Eosinophilic esophagitis |                           |
|-------------------------------------|---------------------|-------------------------------------|-------------------------------------|------------------------------------------|------------------------------------------|--------------------------------------|---------------------|----------------------------|--------------------------|---------------------------|
| Study name                          | CHRONOS             |                                     | QUEST                               |                                          | SINUS-52                                 |                                      | SOLO-1 and SOLO-2   |                            | EoE PoC                  |                           |
| Study duration                      | 52 weeks            |                                     | 52 weeks                            |                                          | 52 weeks                                 |                                      | 16 weeks            |                            | 12 weeks                 |                           |
| Treatment group                     | Placebo<br>qw + TCS | Dupilumab<br>300 mg<br>q2w +<br>TCS | Placebo<br>2mL q2w<br>+<br>ICS/LABA | Dupilumab<br>300 mg<br>q2w +<br>ICS/LABA | Placebo<br>q2w +<br>INCS                 | Dupilumab<br>300 mg<br>q2w +<br>INCS | Placebo<br>qw       | Dupilumab<br>300 mg<br>q2w | Placebo<br>qw            | Dupilumab<br>300 mg<br>qw |
| <b>Serum TARC (pg/mL)</b>           |                     |                                     |                                     |                                          |                                          |                                      |                     |                            |                          |                           |
| n                                   | 313                 | 110                                 | 319                                 | 622                                      | 149                                      | 147                                  | 454                 | 464                        | 24                       | 22                        |
| Mean (SE)<br>at baseline            | 7291.72<br>(738.03) | 9678.78<br>(1828.09)                | 398.00<br>(19.27)                   | 364.66<br>(11.84)                        | 370.20<br>(21.03)                        | 372.27<br>(20.94)                    | 5933.28<br>(487.89) | 6864.12<br>(703.81)        | 350.83<br>(43.43)        | 275.54<br>(27.82)         |
| n                                   | 120                 | 84                                  | 248                                 | 479                                      | 127                                      | 139                                  | 194                 | 361                        | 19                       | 22                        |
| Mean (SE)<br>at end of<br>treatment | 1960.14<br>(377.87) | 479.11<br>(43.13)                   | 520.36<br>(143.08)                  | 234.72<br>(7.95)                         | 332.49<br>(20.13)                        | 219.43<br>(10.77)                    | 3239.13<br>(738.27) | 572.33<br>(38.71)          | 322.63<br>(43.09)        | 203.38<br>(22.29)         |

|                                                      |                   |                     |                 |                 |                |                 |                   |                   |                |                |
|------------------------------------------------------|-------------------|---------------------|-----------------|-----------------|----------------|-----------------|-------------------|-------------------|----------------|----------------|
| n                                                    | 119               | 84                  | 246             | 473             | 126            | 137             | 193               | 360               | 19             | 21             |
| Mean change (SE) from baseline at end of treatment   | -2450.77 (592.10) | -10341.70 (2315.52) | 137.66 (137.49) | -122.78 (10.02) | -15.09 (11.67) | -158.53 (14.93) | -1043.61 (446.81) | -5370.36 (700.55) | -10.11 (24.98) | -71.23 (17.90) |
| n                                                    | 119               | 84                  | 246             | 473             | 126            | 137             | 193               | 360               | 19             | 21             |
| Mean % change (SE) from baseline at end of treatment | -29.14 (11.50)    | -78.37 (3.97)       | 25.90 (9.43)    | -22.74 (2.31)   | 1.28 (2.99)    | -36.16 (1.91)   | 10.22 (9.49)      | -69.80 (1.71)     | 0.14 (6.70)    | -21.06 (5.73)  |

**Plasma eotaxin-3 (pg/mL)**

|                               |  |              |               |              |              |
|-------------------------------|--|--------------|---------------|--------------|--------------|
| n                             |  | 318          | 625           | 150          | 146          |
| Mean (SE) at baseline         |  | 50.90 (3.25) | 69.53 (19.26) | 90.84 (9.08) | 70.61 (3.74) |
| n                             |  | 246          | 473           | 127          | 139          |
| Mean (SE) at end of treatment |  | 50.46 (2.89) | 29.81 (1.73)  | 82.62 (8.13) | 30.40 (1.28) |
| n                             |  | 243          | 469           | 127          | 136          |

|                                                      |  |  |                  |                   |                 |                  |  |  |  |  |
|------------------------------------------------------|--|--|------------------|-------------------|-----------------|------------------|--|--|--|--|
| Mean change (SE) from baseline at end of treatment   |  |  | 0.28<br>(2.76)   | -48.00<br>(24.33) | 1.40<br>(4.75)  | -39.95<br>(3.60) |  |  |  |  |
| n                                                    |  |  | 243              | 469               | 127             | 136              |  |  |  |  |
| Mean % change (SE) from baseline at end of treatment |  |  | 57.13<br>(20.38) | -20.95<br>(5.39)  | 14.88<br>(5.42) | -39.10<br>(7.01) |  |  |  |  |

| <b>Serum total IgE (IU/mL)</b> |                     |                     |                   |                   |                   |                   |                     |                     |                    |                   |
|--------------------------------|---------------------|---------------------|-------------------|-------------------|-------------------|-------------------|---------------------|---------------------|--------------------|-------------------|
| n                              | 312                 | 110                 | 318               | 626               | 150               | 148               | 456                 | 465                 | 24                 | 23                |
| Mean (SE) at baseline          | 5082.55<br>(249.43) | 5653.27<br>(423.00) | 448.47<br>(44.67) | 415.05<br>(28.03) | 228.59<br>(21.94) | 211.79<br>(21.16) | 6999.88<br>(481.27) | 6715.38<br>(485.50) | 478.46<br>(198.56) | 204.17<br>(66.31) |
| n                              | 117                 | 83                  | 251               | 482               | 128               | 140               | 196                 | 366                 | 19                 | 23                |
| Mean (SE) at end of treatment  | 4203.74<br>(390.15) | 2132.49<br>(331.55) | 432.44<br>(49.46) | 135.61<br>(14.64) | 292.03<br>(46.24) | 54.64<br>(5.78)   | 5676.28<br>(649.71) | 3444.88<br>(295.04) | 423.05<br>(169.52) | 137.09<br>(40.04) |
| n                              | 116                 | 83                  | 248               | 478               | 128               | 139               | 196                 | 366                 | 19                 | 23                |



|                                                      |                  |                   |               |                 |               |                 |                 |                   |                |                |
|------------------------------------------------------|------------------|-------------------|---------------|-----------------|---------------|-----------------|-----------------|-------------------|----------------|----------------|
| Mean change (SE) from baseline at end of treatment   | -118.83 (219.48) | -3797.40 (399.55) | -4.03 (20.45) | -294.80 (23.76) | 64.09 (32.08) | -156.92 (17.93) | 366.67 (243.19) | -3027.83 (277.28) | -74.84 (76.03) | -67.09 (27.11) |
| n                                                    | 116              | 83                | 248           | 478             | 128           | 139             | 196             | 366               | 19             | 23             |
| Mean % change (SE) from baseline at end of treatment | 68.42 (52.90)    | -66.25 (3.17)     | 9.89 (4.33)   | -58.43 (7.24)   | 20.82 (5.72)  | -67.28 (1.63)   | 22.74 (4.25)    | -41.90 (2.71)     | 4.9 (5.1)      | -25.3 (2.8)    |

**Serum periostin (ng/mL)**

|                               |  |              |              |               |               |  |              |              |
|-------------------------------|--|--------------|--------------|---------------|---------------|--|--------------|--------------|
| n                             |  | 319          | 629          | 150           | 147           |  | 24           | 22           |
| Mean (SE) at baseline         |  | 80.94 (2.28) | 78.42 (1.51) | 113.00 (4.03) | 109.70 (4.06) |  | 62.16 (6.20) | 61.18 (3.90) |
| n                             |  | 253          | 490          | 120           | 128           |  | 18           | 23           |
| Mean (SE) at end of treatment |  | 75.52 (2.36) | 59.82 (1.13) | 108.11 (5.06) | 66.06 (2.31)  |  | 73.18 (7.19) | 52.67 (3.04) |
| n                             |  | 251          | 488          | 120           | 127           |  | 18           | 22           |

|                                                      |  |  |                 |                  |                 |                  |  |  |                  |                 |
|------------------------------------------------------|--|--|-----------------|------------------|-----------------|------------------|--|--|------------------|-----------------|
| Mean change (SE) from baseline at end of treatment   |  |  | -5.05<br>(1.76) | -18.90<br>(1.40) | -4.73<br>(3.52) | -45.42<br>(3.91) |  |  | 9.91<br>(5.20)   | -8.25<br>(3.23) |
| n                                                    |  |  | 251             | 488              | 120             | 127              |  |  | 18               | 22              |
| Mean % change (SE) from baseline at end of treatment |  |  | -2.37<br>(1.88) | -17.80<br>(1.11) | 0.15<br>(3.66)  | -33.93<br>(2.64) |  |  | 32.85<br>(19.31) | -8.22<br>(6.95) |

**Blood eosinophils (Giga/L)**

|                               |                |                |                |                |                |                |                |                |                |                |
|-------------------------------|----------------|----------------|----------------|----------------|----------------|----------------|----------------|----------------|----------------|----------------|
| n                             | 314            | 110            | 320            | 632            | 150            | 148            | 454            | 465            | 24             | 23             |
| Mean (SE) at baseline         | 0.55<br>(0.03) | 0.58<br>(0.06) | 0.39<br>(0.02) | 0.35<br>(0.02) | 0.45<br>(0.03) | 0.45<br>(0.03) | 0.62<br>(0.03) | 0.60<br>(0.03) | 0.43<br>(0.06) | 0.31<br>(0.04) |
| n                             | 120            | 83             | 245            | 476            | 129            | 140            | 195            | 360            | 21             | 22             |
| Mean (SE) at end of treatment | 0.34<br>(0.02) | 0.40<br>(0.04) | 0.35<br>(0.02) | 0.33<br>(0.02) | 0.44<br>(0.04) | 0.37<br>(0.03) | 0.45<br>(0.04) | 0.57<br>(0.04) | 0.43<br>(0.07) | 0.17<br>(0.02) |
| n                             | 119            | 83             | 245            | 476            | 129            | 139            | 194            | 360            | 21             | 22             |

|                                                      |                  |                  |                  |                  |                 |                  |                 |                 |                  |                  |
|------------------------------------------------------|------------------|------------------|------------------|------------------|-----------------|------------------|-----------------|-----------------|------------------|------------------|
| Mean change (SE) from baseline at end of treatment   | -0.17<br>(0.03)  | -0.20<br>(0.05)  | -0.05<br>(0.02)  | -0.01<br>(0.02)  | 0<br>(0.03)     | -0.08<br>(0.04)  | -0.07<br>(0.03) | 0<br>(0.03)     | 0<br>(0.08)      | -0.14<br>(0.03)  |
| n                                                    | 119              | 83               | 242              | 469              | 128             | 139              | 190             | 346             | 20               | 21               |
| Mean % change (SE) from baseline at end of treatment | -10.02<br>(6.69) | -19.92<br>(7.07) | 33.60<br>(13.26) | 43.76<br>(13.93) | 12.88<br>(8.85) | 24.12<br>(18.25) | -1.49<br>(7.14) | 12.89<br>(5.91) | -8.06<br>(11.94) | -43.71<br>(6.11) |

---

Note: Grey cells indicate that data were not collected or available for these patients.

Abbreviations: EoE, eosinophilic esophagitis; IU, international units; ICS, inhaled corticosteroids; IgE, immunoglobulin E; INCS, intranasal corticosteroids; LABA, long-acting  $\beta_2$ -agonist; n, number; PoC, proof of concept; qw, weekly; q2w, every 2 weeks; SE, standard error; TARC, thymus and activation-regulated chemokine; TCS, topical corticosteroids.

**APPENDIX S3** The effect of dupilumab on mean ( $\pm$  SE) concentrations of blood eosinophils (Giga/L). AD, atopic dermatitis; CRSwNP, chronic rhinosinusitis with nasal polyps; EoE, eosinophilic esophagitis; PoC, proof of concept; qw, weekly; q2w, every 2 weeks; SE, standard error.

AD patients from CHRONOS      Asthma patients from QUEST      CRSwNP patients from SINUS-52      AD patients from SOLO-1 and SOLO-2      EoE patients from EoE PoC  
 ●---● Placebo qw   ●---● Dupilumab 300 mg q2w   ▲---▲ Placebo q2w   ▲---▲ Dupilumab 300 mg q2w   ■---■ Placebo q2w   ■---■ Dupilumab 300 mg q2w   ◆---◆ Placebo qw   ◆---◆ Dupilumab 300 mg q2w   ✕---✕ Placebo qw   ✕---✕ Dupilumab 300 mg qw

(A) 52-week studies in AD, asthma, and CRSwNP

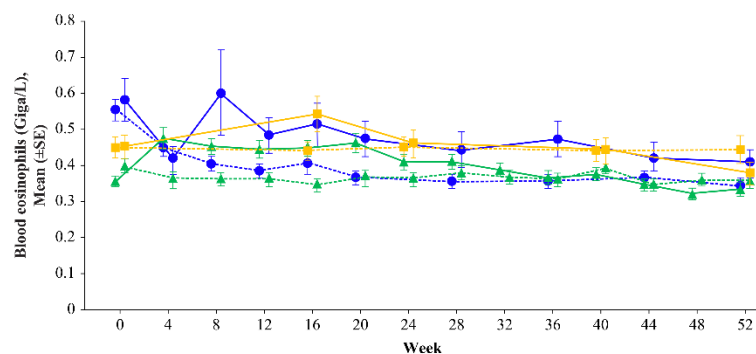

| Number of patients           | 0   | 4   | 8   | 12  | 16  | 20  | 24  | 28  | 32  | 36  | 40  | 44  | 48  | 52  |
|------------------------------|-----|-----|-----|-----|-----|-----|-----|-----|-----|-----|-----|-----|-----|-----|
| AD, placebo qw               | 314 | 269 | 240 | 207 | 187 | 172 |     | 151 |     | 135 |     | 125 |     | 120 |
| AD, dupilumab 300 mg q2w     | 110 | 98  | 97  | 90  | 91  | 90  |     | 86  |     | 84  |     | 83  |     | 83  |
| Asthma, placebo q2w          | 320 | 307 | 305 | 302 | 300 | 291 | 289 | 294 | 294 | 290 | 290 | 281 | 277 | 245 |
| Asthma, dupilumab 300 mg q2w | 632 | 616 | 587 | 595 | 596 | 581 | 577 | 576 | 560 | 568 | 561 | 552 | 537 | 476 |
| CRSwNP, placebo q2w          | 150 |     |     |     | 143 |     | 137 |     |     |     | 131 |     |     | 129 |
| CRSwNP, dupilumab 300 mg q2w | 148 |     |     |     | 141 |     | 142 |     |     |     | 140 |     |     | 140 |

(B) 12- to 16-week studies in EoE and AD

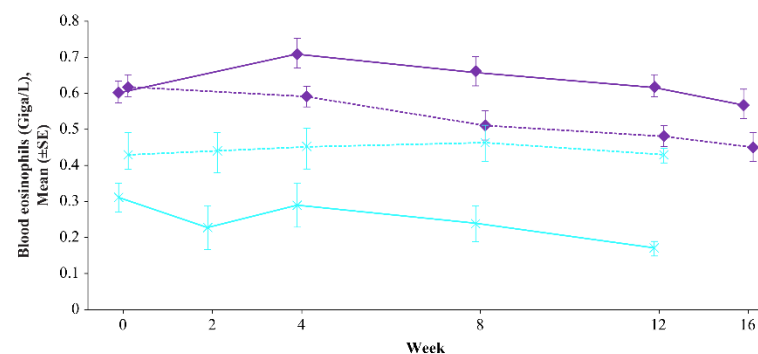

| Number of patients       | 0   | 2  | 4   | 8   | 12  | 16  |
|--------------------------|-----|----|-----|-----|-----|-----|
| AD, placebo qw           | 454 |    | 324 | 235 | 208 | 195 |
| AD, dupilumab 300 mg q2w | 465 |    | 412 | 392 | 382 | 360 |
| EoE, placebo qw          | 24  | 23 | 21  | 20  | 21  |     |
| EoE, dupilumab 300 mg qw | 23  | 23 | 23  | 21  | 22  |     |
